# Supplementary material
Source: PubMed Central journal article supplement (PMC4135596)

Figure S1

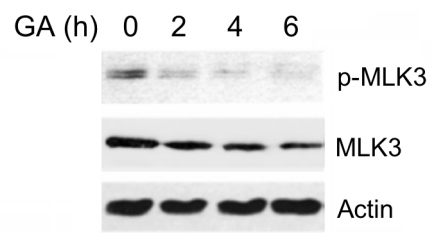

Supplement: MCB.00296-14_zmb999100536so2.pdf [file MCB.00296-14_zmb999100536so2.pdf]

Figure S2

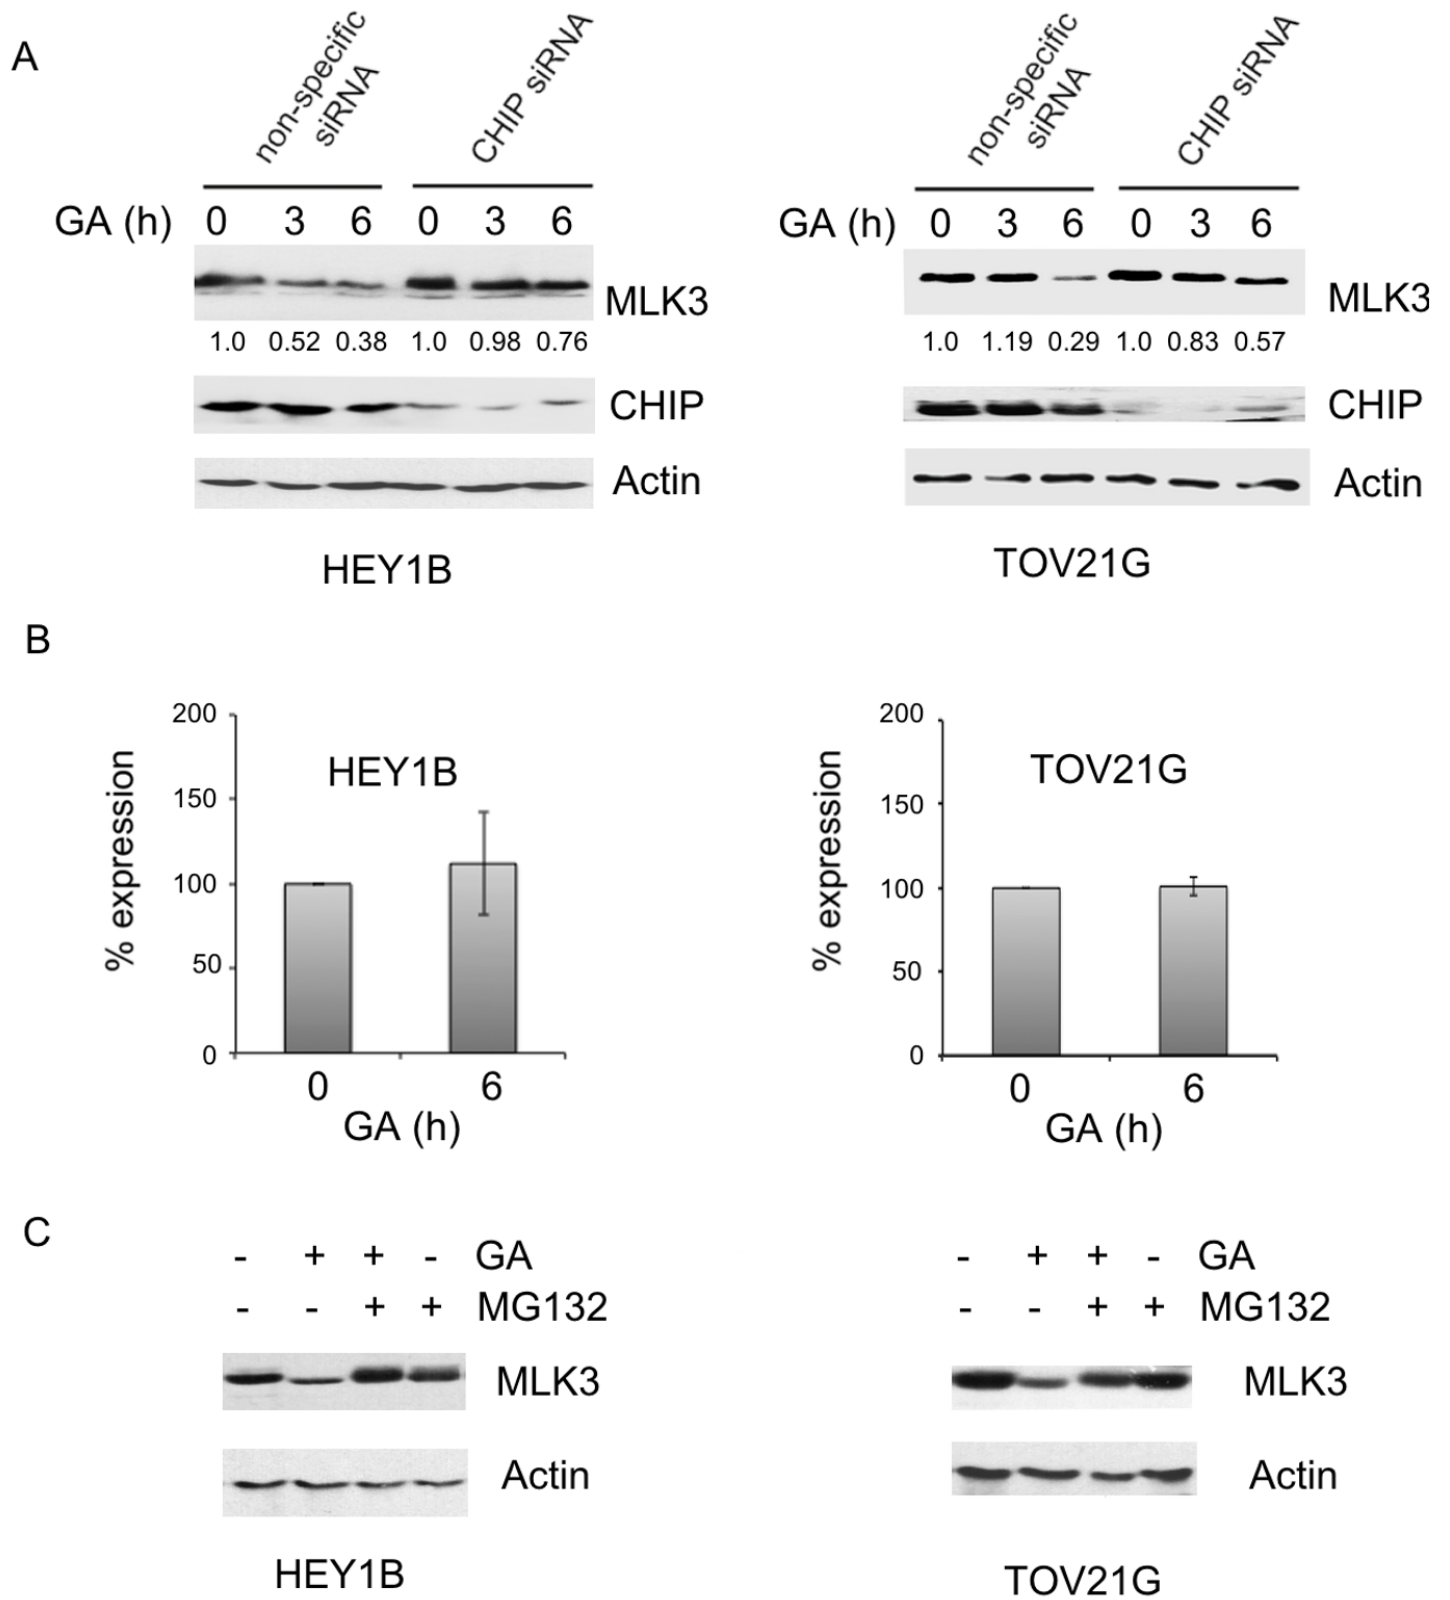

Supplement: MCB.00296-14_zmb999100536so3.pdf [file MCB.00296-14_zmb999100536so3.pdf]

Figure S3

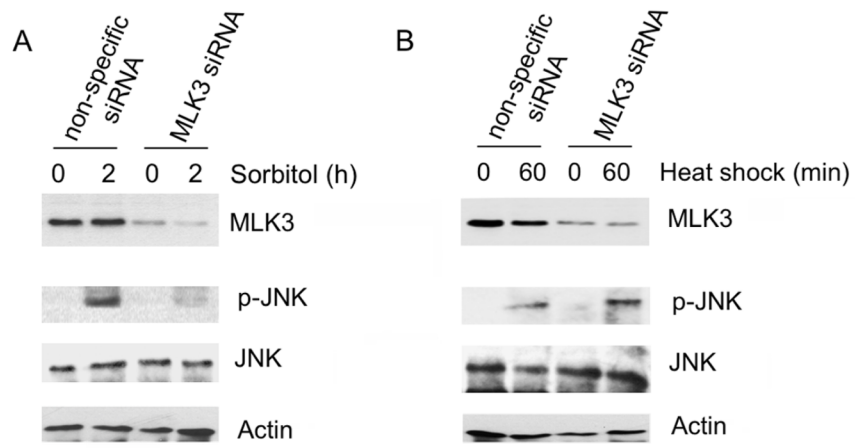

Supplement: MCB.00296-14_zmb999100536so4.pdf [file MCB.00296-14_zmb999100536so4.pdf]
